# Supplementary material for: Vitamin D Deficiency Is Significantly Associated with Retinopathy in Type 2 Diabetes Mellitus: A Case-Control Study
Source: MDPI journal article supplement (doi:10.3390/nu14010084), 2021-12-25
Supplement: s1 [file s1]

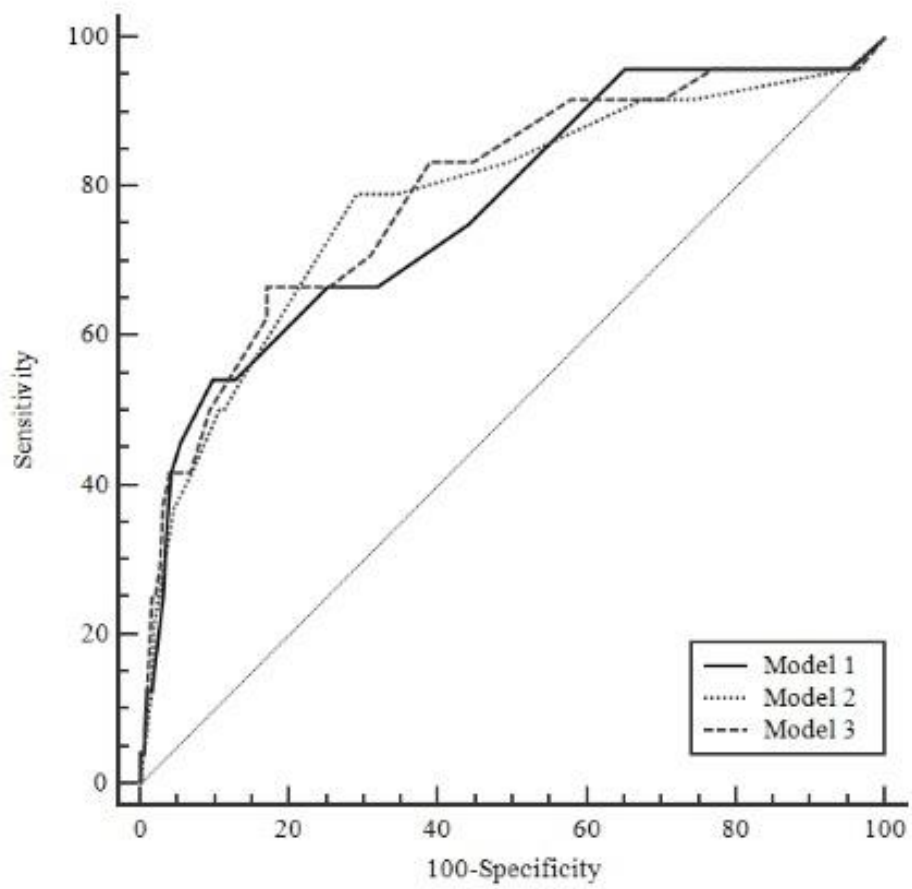

**Figure S1.** Area under de curve of the 3 models. Pairwise comparison of ROC curves: DeLong test.

Model 1 vs Model 2:  $p=0.779$ ; Model 1 vs Model 3:  $p=0.366$  Model 2 vs Model 3:  $p=0.455$

**Table S1.** Initial model, Model 0, and steps in conditional backward selection variables.

|                |                                              | B      | Standar<br>error | Wald   | df | pvalue<br>. | OR     | 95% CI   |          |
|----------------|----------------------------------------------|--------|------------------|--------|----|-------------|--------|----------|----------|
|                |                                              |        |                  |        |    |             |        | Inferior | Superior |
| <b>Model 0</b> | Age                                          | .028   | .031             | .836   | 1  | .381        | 1.029  | .968     | 1.093    |
|                | BMI <25 (reference)                          |        |                  | 2.400  | 2  | .301        |        |          |          |
|                | Overweight 25 - 29.99                        | -.168  | .787             | .046   | 1  | .830        | .845   | .181     | 3.947    |
|                | Obesity (> 30)                               | -.960  | .847             | 1.285  | 1  | .257        | .383   | .073     | 2.014    |
|                | Years since diagnosis: < 5 years (reference) |        |                  | 6.307  | 5  | .277        |        |          |          |
|                | 6-9 years                                    | 1.834  | 1.166            | 2.471  | 1  | .116        | 6.257  | .636     | 61.549   |
|                | 10-14 years                                  | 1.872  | 1.122            | 2.785  | 1  | .095        | 6.502  | .721     | 58.612   |
|                | 15-19 years                                  | 0.741  | 1.275            | .338   | 1  | .561        | 2.098  | .172     | 25.517   |
|                | 20-24 years                                  | .226   | 1.971            | .013   | 1  | .909        | 1.253  | .026     | 59.606   |
|                | ≥ 25 years                                   | 2.386  | 1.313            | 3.302  | 1  | .069        | 10.865 | .829     | 142.406  |
|                | Treatment of diabetes: diet (reference)      |        |                  | 7.542  | 3  | .056        |        |          |          |
|                | OAD                                          | .999   | 1.134            | .776   | 1  | .378        | 2.716  | .294     | 25.073   |
|                | Insulin                                      | 3.066  | 1.418            | 4.674  | 1  | .031        | 21.461 | 1.332    | 345.823  |
|                | OAD + Insulin                                | 2.317  | 1.276            | 3.299  | 1  | .069        | 10.147 | .832     | 123.690  |
|                | HBA1C: < 7% (REFERENCE)                      |        |                  | .620   | 3  | .892        |        |          |          |
|                | 7-8%                                         | .068   | .649             | .011   | 1  | .916        | 1.070  | .300     | 3.819    |
|                | 8,01-10%                                     | -.343  | .949             | .131   | 1  | .718        | .710   | .110     | 4.557    |
|                | > 10%                                        | 1.007  | 2.191            | .211   | 1  | .646        | 2.738  | .037     | 200.745  |
|                | HBP: normotense (reference)                  |        |                  | 3.255  | 2  | .196        |        |          |          |
|                | STAGE 1                                      | 1.038  | .619             | 2.808  | 1  | .094        | 2.823  | .839     | 9.503    |
|                | STAGE 2                                      | 1.217  | .922             | 1.742  | 1  | -.187       | 3.377  | .554     | 20.578   |
|                | Cardiovascular events (number)               | -.146  | .360             | .164   | 1  | .685        | .864   | .426     | 1.751    |
|                | Renal failiure                               | .510   | .563             | .820   | 1  | .365        | 1.666  | .552     | 5.025    |
|                | 25(OH) D (<16 ng/ml)                         | .783   | .522             | 2.247  | 1  | .134        | 2.189  | .786     | 6.094    |
|                | 1,25 (OH)2 D (< 29 pg/ml)                    | .801   | .541             | 2.193  | 1  | .139        | 2.228  | .772     | 6.432    |
|                | Constant                                     | -8.697 | 2.772            | 9.843  | 1  | .002        | .000   |          |          |
| Step 2         | AGE                                          | .028   | .029             | .943   | 1  | .332        | 1.029  | .972     | 1.089    |
|                | BMI < 25 (reference)                         |        |                  | 2.972  | 2  | .226        |        |          |          |
|                | Overweight 25 - 29.99                        | -.310  | .737             | .177   | 1  | .674        | .734   | .173     | 3.110    |
|                | Obesity (> 30)                               | -1.119 | .782             | 2.045  | 1  | .153        | .327   | .071     | 1.514    |
|                | Years_evolución diabetes (≤ 5 years)         |        |                  | 6.064  | 5  | .300        |        |          |          |
|                | 6-9 years                                    | 1.842  | 1.166            | 2.493  | 1  | .114        | 6.307  | .641     | 62.022   |
|                | 10-14 years                                  | 1.861  | 1.118            | 2.772  | 1  | .096        | 6.430  | .719     | 57.508   |
|                | 15-19 years                                  | .753   | 1.271            | .351   | 1  | .554        | 2.123  | .176     | 25.632   |
|                | 20-24 years                                  | .441   | 1.689            | .068   | 1  | .794        | 1.554  | .057     | 42.529   |
|                | ≥ 25 years                                   | 2.270  | 1.257            | 3.260  | 1  | .071        | 9.682  | .824     | 113.810  |
|                | Treatment of diabetes: diet (reference)      |        |                  | 10.637 | 3  | .014        |        |          |          |
|                | OAD                                          | 1.035  | 1.124            | .848   | 1  | .357        | 2.815  | .311     | 25.479   |

|        |                                              |        |       |        |   |      |        |       |         |
|--------|----------------------------------------------|--------|-------|--------|---|------|--------|-------|---------|
|        | Insulin                                      | 3.141  | 1.304 | 5.800  | 1 | .016 | 23.120 | 1.794 | 297.894 |
|        | OAD + Insulin                                | 2.251  | 1.194 | 3.551  | 1 | .060 | 9.496  | .914  | 98.691  |
|        | HBP: normotense (reference)                  |        |       | 3.283  | 2 | .194 |        |       |         |
|        | STAGE 1                                      | .981   | .603  | 2.644  | 1 | .104 | 2.668  | .818  | 8.704   |
|        | STAGE 2                                      | 1.291  | .897  | 2.074  | 1 | .150 | 3.637  | .627  | 21.081  |
|        | Cardiovascular events (number)               | -.173  | .346  | .251   | 1 | .616 | .841   | .427  | 1.657   |
|        | Renal failiure                               | .533   | .550  | .939   | 1 | .333 | 1.703  | .580  | 5.002   |
|        | Niveles 25 (OH) D ( $\leq$ 16 ng/ml)         | .802   | .519  | 2.384  | 1 | .123 | 2.229  | .806  | 6.167   |
|        | 1,25 (OH)2 D (< 29 pg/ml)                    | .748   | .533  | 1.971  | 1 | .160 | 2.113  | .744  | 6.006   |
|        | Constant                                     | -8.527 | 2.652 | 10.338 | 1 | .001 | .000   |       |         |
| Step 3 | AGE                                          | .025   | .028  | .774   | 1 | .379 | 1.025  | .970  | 1.084   |
|        | BMI < 25 (reference)                         |        |       | 2.921  | 2 | .232 |        |       |         |
|        | Overweight 25 - 29.99                        | -.267  | .730  | .134   | 1 | .714 | .765   | .183  | 3.199   |
|        | Obesity (> 30)                               | -1.081 | .775  | 1.948  | 1 | .163 | .339   | .074  | 1.548   |
|        | Years since diagnosis: < 5 years (reference) |        |       | 6.214  | 5 | .286 |        |       |         |
|        | 6-9 years                                    | 1.812  | 1.161 | 2.434  | 1 | .119 | 6.122  | .629  | 59.636  |
|        | 10-14 years                                  | 1.877  | 1.114 | 2.840  | 1 | .092 | 6.535  | .736  | 57.984  |
|        | 15-19 years                                  | .740   | 1.265 | .342   | 1 | .558 | 2.097  | .176  | 25.042  |
|        | 20-24 years                                  | .466   | 1.662 | .079   | 1 | .779 | 1.594  | .061  | 41.374  |
|        | $\geq$ 25 years                              | 2.289  | 1.252 | 3.341  | 1 | .068 | 9.861  | .848  | 114.720 |
|        | Treatment of diabetes: diet (reference)      |        |       | 10.405 | 3 | .015 |        |       |         |
|        | OAD                                          | 1.056  | 1.128 | .875   | 1 | .349 | 2.874  | .315  | 26.245  |
|        | Insulin                                      | 3.098  | 1.305 | 5.636  | 1 | .018 | 22.160 | 1.717 | 286.065 |
|        | OAD + Insulin                                | 2.238  | 1.199 | 3.485  | 1 | .062 | 9.377  | .848  | 114.720 |
|        | HBP: normotense (reference)                  |        |       | 3.365  | 2 | .186 |        |       |         |
|        | STAGE 1                                      | .987   | .607  | 2.645  | 1 | .104 | 2.682  | .817  | 8.810   |
|        | STAGE 2                                      | 1.334  | .894  | 2.230  | 1 | .135 | 3.797  | .659  | 21.878  |
|        | Renal failiure                               | .496   | .544  | .831   | 1 | .362 | 1.643  | .565  | 4.775   |
|        | 25(OH) D (< 16 ng/ml)                        | .811   | .518  | 2.449  | 1 | .118 | 2.250  | .815  | 6.210   |
|        | 1,25 (OH)2 D (< 29 pg/ml)                    | .742   | .532  | 1.946  | 1 | .163 | 2.101  | .740  | 5.963   |
|        | Constant                                     | -8.420 | 2.639 | 10.180 | 1 | .001 | .000   |       |         |
| Step 4 | BMI < 25 (reference)                         |        |       | 2.952  | 2 | .229 |        |       |         |
|        | Overweight 25 - 29.99                        | -.293  | .734  | .159   | 1 | .690 | .746   | .177  | 3.144   |
|        | Obesity (> 30)                               | -1.098 | .777  | 1.998  | 1 | .157 | .334   | .073  | 1.529   |
|        | Years since diagnosis: < 5 years (reference) |        |       | 6.362  | 5 | .273 |        |       |         |
|        | 6-9 years                                    | 1.767  | 1.147 | 2.372  | 1 | .124 | 5.852  | .618  | 55.439  |
|        | 10-14 years                                  | 1.866  | 1.105 | 2.854  | 1 | .091 | 6.465  | .742  | 56.354  |
|        | 15-19 years                                  | .817   | 1.253 | .426   | 1 | .514 | 2.265  | .194  | 26.374  |
|        | 20-24 years                                  | .357   | 1.687 | .045   | 1 | .832 | 1.429  | .052  | 38.985  |
|        | $\geq$ 25 years                              | 2.371  | 1.245 | 3.624  | 1 | .057 | 10.704 | .932  | 122.895 |
|        | Treatment of diabetes: diet (reference)      |        |       | 10.563 | 3 | .014 |        |       |         |
|        | OAD                                          | 1.026  | 1.130 | .825   | 1 | .364 | 2.791  | .305  | 25.548  |

|        |                                              |        |       |        |   |      |        |       |         |
|--------|----------------------------------------------|--------|-------|--------|---|------|--------|-------|---------|
|        | Insulin                                      | 3.054  | 1.297 | 5.544  | 1 | .019 | 21.209 | 1.669 | 269.579 |
|        | OAD + Insulin                                | 2.231  | 1.199 | 3.462  | 1 | .063 | 10.704 | .888  | 97.732  |
|        | HBP: normotense (reference)                  |        |       | 3.471  | 2 | .176 |        |       |         |
|        | STAGE 1                                      | 1.040  | .603  | 2.975  | 1 | .085 | 2.829  | .868  | 9.225   |
|        | STAGE 2                                      | 1.282  | .909  | 1.991  | 1 | .158 | 3.605  | .607  | 21.397  |
|        | Renal failiure                               | .598   | .532  | 1.261  | 1 | .261 | 1.818  | .641  | 5.156   |
|        | 25 (OH) D ( $\leq$ 16 ng/ml)                 | .853   | .514  | 2.752  | 1 | .097 | 2.346  | .857  | 6.423   |
|        | 1,25 (OH)2 D (< 29 pg/ml)                    | .772   | .532  | 2.105  | 1 | .147 | 2.164  | .763  | 6.142   |
|        | Constant                                     | -6.676 | 1.668 | 16.023 | 1 | .000 | .001   |       |         |
| Step 5 | BMI < 25 (reference)                         |        |       | 3.039  | 2 | .219 |        |       |         |
|        | Overweight 25 - 29.99                        | -.302  | .728  | .172   | 1 | .679 | .739   | .177  | 3.083   |
|        | Obesity (> 30)                               | -1.112 | .772  | 2.078  | 1 | .149 | .329   | .072  | 1.492   |
|        | Years since diagnosis: < 5 years (reference) |        |       | 6.386  | 5 | .270 |        |       |         |
|        | 6-9 years                                    | 1.821  | 1.149 | 2.512  | 1 | .113 | 6.176  | .650  | 58.678  |
|        | 10-14 years                                  | 1.899  | 1.106 | 2.950  | 1 | .086 | 6.680  | .765  | 58.342  |
|        | 15-19 years                                  | 1.004  | 1.238 | .658   | 1 | .417 | 2.730  | .241  | 30.893  |
|        | 20-24 years                                  | .619   | 1.633 | .144   | 1 | .704 | 1.858  | .076  | 45.557  |
|        | $\geq$ 25 years                              | 2.529  | 1.227 | 4.251  | 1 | .039 | 12.546 | 1.133 | 138.906 |
|        | Treatment of diabetes: diet (reference)      |        |       | 11.052 | 3 | .011 |        |       |         |
|        | OAD                                          | 1.051  | 1.122 | .877   | 1 | .349 | 2.860  | .317  | 25.791  |
|        | Insulin                                      | 3.046  | 1.284 | 5.627  | 1 | .018 | 21.031 | 1.698 | 260.524 |
|        | OAD + Insulin                                | 2.311  | 1.186 | 3.799  | 1 | .051 | 10.089 | .987  | 103.119 |
|        | HBP: normotense (reference)                  |        |       | 5.082  | 2 | .079 |        |       |         |
|        | STAGE 1                                      | 1.212  | .578  | 4.390  | 1 | .036 | 3.359  | 1.081 | 10.437  |
|        | STAGE 2                                      | 1.461  | .885  | 2.721  | 1 | .099 | 4.309  | .760  | 24.438  |
|        | 25 (OH) D ( $\leq$ 16 ng/ml)                 | .901   | .506  | 3.174  | 1 | .075 | 2.462  | .914  | 6.633   |
|        | 1,25 (OH)2 D (< 29 pg/ml)                    | .781   | .528  | 2.192  | 1 | .139 | 2.184  | .776  | 6.143   |
|        | Constant                                     | -6.720 | 1.661 | 16.373 | 1 | .000 | .001   |       |         |
| Step 6 | Years since diagnosis: < 5 years (reference) |        |       | 6.282  | 5 | .280 |        |       |         |
|        | 6-9 years                                    | 1.672  | 1.133 | 2.177  | 1 | .140 | 5.322  | .578  | 49.034  |
|        | 10-14 years                                  | 1.782  | 1.099 | 2.627  | 1 | .105 | 5.940  | .689  | 51.237  |
|        | 15-19 years                                  | 1.099  | 1.225 | .805   | 1 | .369 | 3.002  | .272  | 33118   |
|        | 20-24 years                                  | .656   | 1.563 | .0176  | 1 | .675 | 1.926  | .090  | 41.260  |
|        | $\geq$ 25 years                              | 2.562  | 1.214 | 4.451  | 1 | .035 | 12.956 | 1.199 | 139.949 |
|        | Treatment of diabetes: diet (reference)      |        |       | 9.873  | 3 | .020 |        |       |         |
|        | OAD                                          | .784   | 1.093 | .514   | 1 | .473 | 2.189  | .257  | 18.639  |
|        | Insulin                                      | 2.622  | 1.237 | 4.492  | 1 | .034 | 13.759 | 1.218 | 155.419 |
|        | OAD + Insulin                                | 2.036  | 1.147 | 3.151  | 1 | .076 | 7.658  | .809  | 72.500  |
|        | HBP: normotense (reference)                  |        |       | 4.930  | 2 | .085 |        |       |         |
|        | STAGE 1                                      | 1.157  | .567  | 4.157  | 1 | .041 | 3.179  | 1.046 | 9.665   |
|        | STAGE 2                                      | 1.477  | .879  | 2.824  | 1 | .093 | 4.381  | .782  | 24.535  |
|        | 25 (OH) D ( $\leq$ 16 ng/ml)                 | .862   | .491  | 3.091  | 1 | .079 | 2.369  | .906  | 6.196   |

|        |                                         |        |       |        |   |      |        |       |         |
|--------|-----------------------------------------|--------|-------|--------|---|------|--------|-------|---------|
|        | 1,25 (OH)2 D (< 29 pg/ml)               | .845   | .518  | 2.658  | 1 | .103 | 2.328  | .843  | 6.432   |
|        | Constant                                | -6.940 | 1.599 | 18.847 | 1 | .000 | .001   |       |         |
| Step 7 | Treatment of diabetes: diet (reference) |        |       | 15.612 | 3 | .001 |        |       |         |
|        | OAD                                     | .636   | 1.075 | .350   | 1 | .554 | 1.889  | .230  | 15.528  |
|        | Insulin                                 | 2.678  | 1.183 | 5.127  | 1 | .024 | 14.553 | 1.433 | 147.776 |
|        | OAD + Insulin                           | 2.231  | 1.108 | 4.054  | 1 | .044 | 9.305  | 1.061 | 81.605  |
|        | HBP: normotense (reference)             |        |       | 3.863  | 2 | .145 |        |       |         |
|        | STAGE 1                                 | .978   | .526  | 3.459  | 1 | .063 | 2.658  | .949  | 7.448   |
|        | STAGE 2                                 | 1.156  | .877  | 1.740  | 1 | .187 | 3.177  | .570  | 17.708  |
|        | 25 (OH) D ( $\leq$ 16 ng/ml)            | .825   | .476  | 2.997  | 1 | .083 | 2.281  | .897  | 5.801   |
|        | 1,25 (OH)2 D (< 29 pg/ml)               | .768   | .505  | 2.315  | 1 | .128 | 2.155  | .801  | 5.797   |
|        | Constant                                | -5.203 | 1.154 | 20.320 | 1 | .000 | .006   |       |         |
|        |                                         |        |       | 4.945  | 2 | .084 |        |       |         |
|        |                                         | 1.025  | .529  | 3.765  | 1 | .052 | 2.788  | .990  | 7.857   |
| Step 8 | Treatment of diabetes: diet (reference) |        |       | 17.419 | 3 | .001 |        |       |         |
|        | OAD                                     | .669   | 1.069 | .391   | 1 | .532 | 1.952  | .240  | 15.858  |
|        | Insulin                                 | 2.834  | 1.167 | 5.900  | 1 | .015 | 17.011 | 1.728 | 167.429 |
|        | OAD + Insulin                           | 2.285  | 1.101 | 4.310  | 1 | .038 | 9.823  | 1.136 | 84.916  |
|        | HBP: normotense (reference)             |        |       | 4.642  | 2 | .098 |        |       |         |
|        | STAGE 1                                 | 1.044  | .528  | 3.916  | 1 | .048 | 2.840  | 1.010 | 7.988   |
|        | STAGE 2                                 | 1.340  | .849  | 2.490  | 1 | .115 | 3.819  | .723  | 20.179  |
|        | 25 (OH) D ( $\leq$ 16 ng/ml)            | 1.029  | .458  | 5.054  | 1 | .025 | 2.799  | 1.141 | 6.866   |
|        | Constant                                | -4.968 | 1.124 | 19.523 | 1 | .000 | .007   |       |         |

**Table S2.** Effect of treatment with insulin controlled for the variables age, years since onset, vitamin D, glycemic control, and control of HBP.

| <b>Variable</b>                    | <b>P value</b> | <b>OR</b> | <b>IC 95%</b> |
|------------------------------------|----------------|-----------|---------------|
| Age                                | 0.249          | 1.03      | 0.98 – 1.09   |
| Years since diagnosis              | 0.679          | 1.02      | 0.95 – 1.09   |
| Treatment DM diet/OAD (reference)  | 0.044          |           |               |
| Insulin                            | 0.033          | 5.76      | 1.16 – 28.69  |
| OAD + Insulin                      | 0.029          | 4.21      | 1.16 – 15.29  |
| 25(OH) D < 16 ng/ml                | 0.162          | 1.97      | 0.76 – 5.12   |
| 1,25(OH) <sub>2</sub> D < 29 pg/ml | 0.103          | 2.33      | 0.84 – 6.47   |
| Glycemic control                   |                |           |               |
| HbA1c < 7 (reference)              | 0.829          |           |               |
| HbA1c 7-7.9                        | 0.607          | 1.37      | 0.41 – 4.57   |
| HbA1c 8-10                         | 0.940          | 1.07      | 0.20 – 5.79   |
| HbA1c >10                          | 0.418          | 4.56      | 0.12 – 179.05 |
| HBP normal (reference)             | 0.222          |           |               |
| Stage 1                            | 0.104          | 2.44      | 0.83 – 7.15   |
| Stage 2                            | 0.263          | 2.75      | 0.47 – 16.17  |
| Constant                           | 0.000          | 0.01      |               |

**Table S3.** Risk of DR (crude OR) according to cut-off for 25(OH)D.

|                                                          | <b>p value</b> | <b>OR</b> | <b>95% CI</b> |
|----------------------------------------------------------|----------------|-----------|---------------|
| Categories 25(OH)D and 1,25(OH) <sub>2</sub> D composite |                |           |               |
| 25(OH)D >16 ng/ml & 1,25(OH) <sub>2</sub> D >29 pg/ml    | 0.011          |           |               |
| 25(OH)D >16 * & 1,25(OH) <sub>2</sub> D ≤29 **           | 0.882          | 1.135     | 0.21 – 6.04   |
| 25(OH)D ≤16 * & 1,25(OH) <sub>2</sub> D >29 **           | 0.341          | 1.853     | 0.52 – 6.61   |
| 25(OH)D ≤16 * & 1,25(OH) <sub>2</sub> D ≤29 **           | 0.003          | 5.212     | 1.76 – 15.42  |
| SEIOMM cutoff threshold                                  |                |           |               |
| 25(OH)D >30 ng/ml                                        | 0,032          |           |               |
| 25(OH)D <10 ng/ml                                        | 0.042          | 3.757     | 1.58 – 13.46  |
| 25(OH)D 10-30 ng/ml                                      | 0.984          | 0.989     | 0.36 – 2.76   |
| IOM cutoff threshold                                     |                |           |               |
| 25(OH)D <20 ng/ml                                        | 0.046          | 2.285     | 1.01 – 5.16   |
| Associated value of Youden index*                        |                |           |               |
| 25(OH)D <16 ng/ml                                        | 0.021          | 2.427     | 1.14 – 5.16   |

SEIOMM: Sociedad Española de Investigación Ósea y del Metabolismo MineralL. IOM: Institute of Medicine. \*Associated value of Youden index in present study.
